# Supplementary material for: The oxidation of copper catalysts during ethylene epoxidation
Source: Royal Society of Chemistry journal article supplement (doi:10.1039/c5cp03722k), 2015-01-01
Supplement: c5cp03722k1.pdf [file c5cp03722k1.pdf]

## Supplementary Information

In-situ O1s and C1s spectra of copper foil  
at 50°C in 1:1 mixture of O<sub>2</sub> and C<sub>2</sub>H<sub>4</sub> at 0.3 mbar

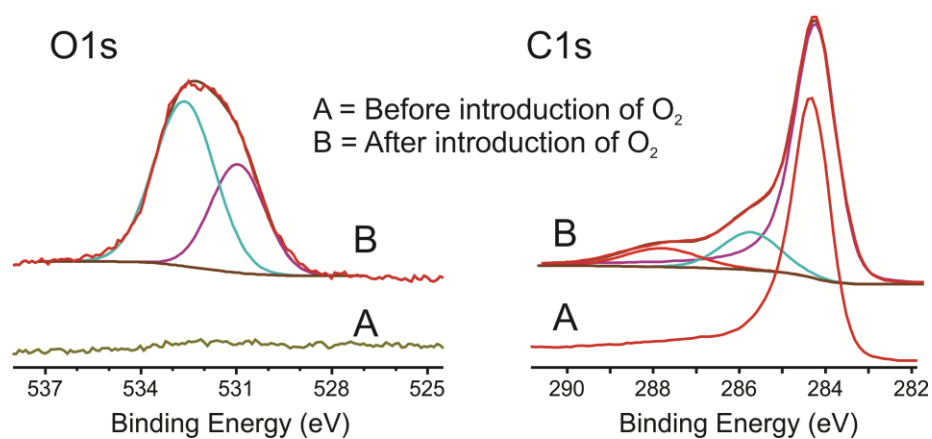

Figure S1 – O1s and C1s spectra measure from a Cu foil at 50°C in (A) 0.3 mbar of C<sub>2</sub>H<sub>4</sub> and (B) 0.3 mbar of 1:1 O<sub>2</sub>+C<sub>2</sub>H<sub>4</sub>

(a) O K-edge during oxidation

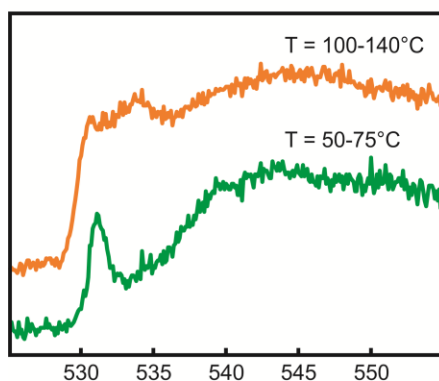

(b) Cu L<sub>3</sub>-edge during oxidation

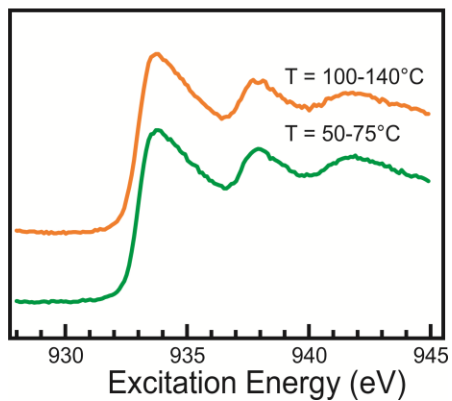

Figure S2 – O K-edge and Cu L<sub>3</sub>-edge of a copper foil during a temperature ramp in a 1:1 mixture of O<sub>2</sub> and C<sub>2</sub>H<sub>4</sub> at 0.5 mbar.

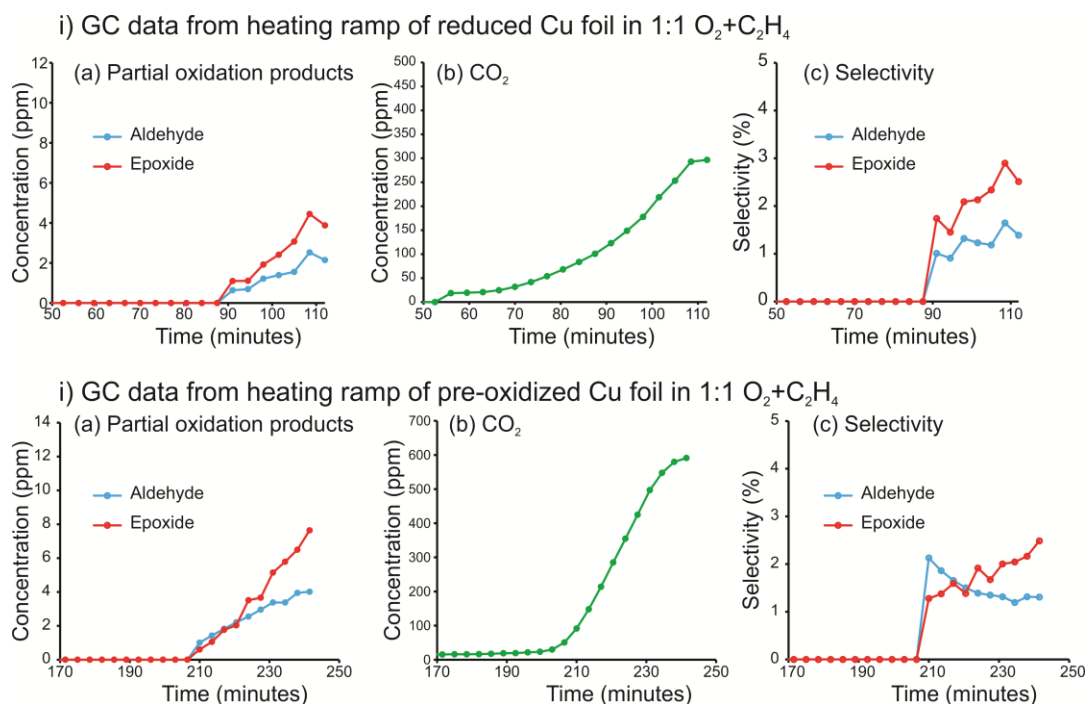

Figure S3 – GC data of copper foil during a heating ramp from 50°C to 400°C in a 1:1 mixture of  $O_2 + C_2H_4$  at 0.3 mbar, starting from i) a reduced metal foil and ii) a pre-oxidized foil. (a) ethylene oxide and ethyl aldehyde production, (b)  $CO_2$  production and (c) ethylene oxide and ethyl aldehyde selectivity

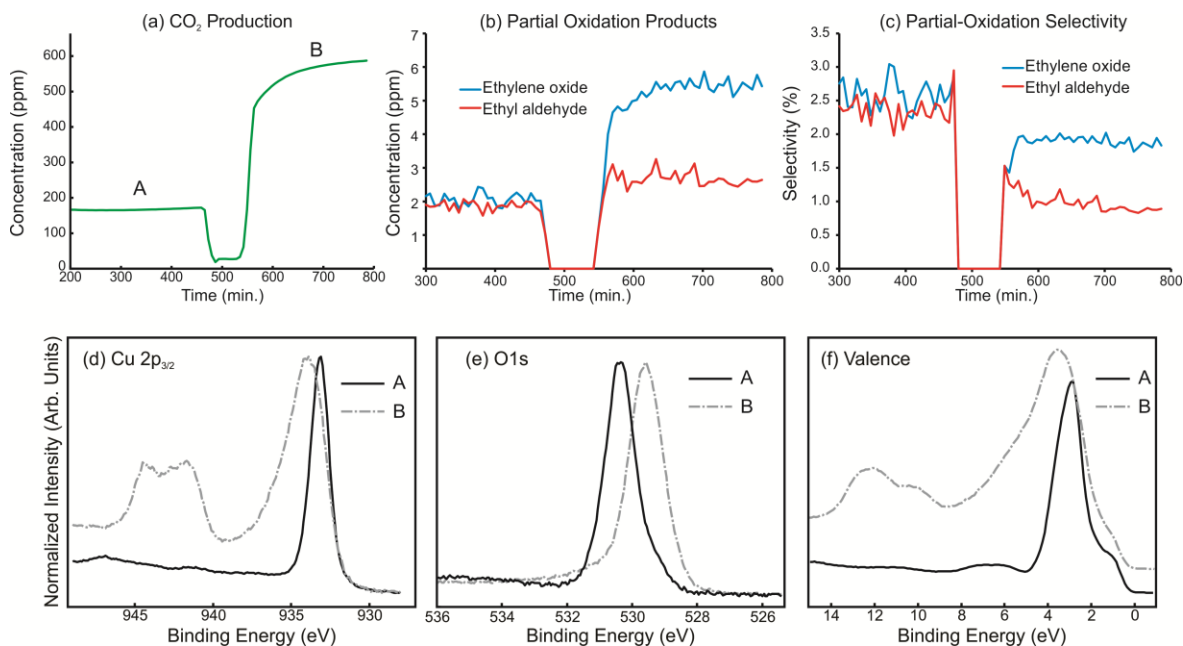

Figure S4 – GC data of (a)  $CO_2$  production, (b) ethylene oxide and ethyl aldehyde production, and (c) ethylene oxide and ethyl aldehyde selectivity from an oxidized copper foil in a 2:1 mixture of  $O_2$  and  $C_2H_4$ , at 0.3 mbar total pressure and at 350°C. The dip in activity from times ca. 450 to 550 minutes is due to a cooling/heating ramp. (d)  $Cu2p_{3/2}$ , (e)  $O1s$  and (f) valence spectra of the surface of the foil at time points labelled A and B in (a).

### Heating ramp of metallic Cu foil in O<sub>2</sub> (0.15 mbar)

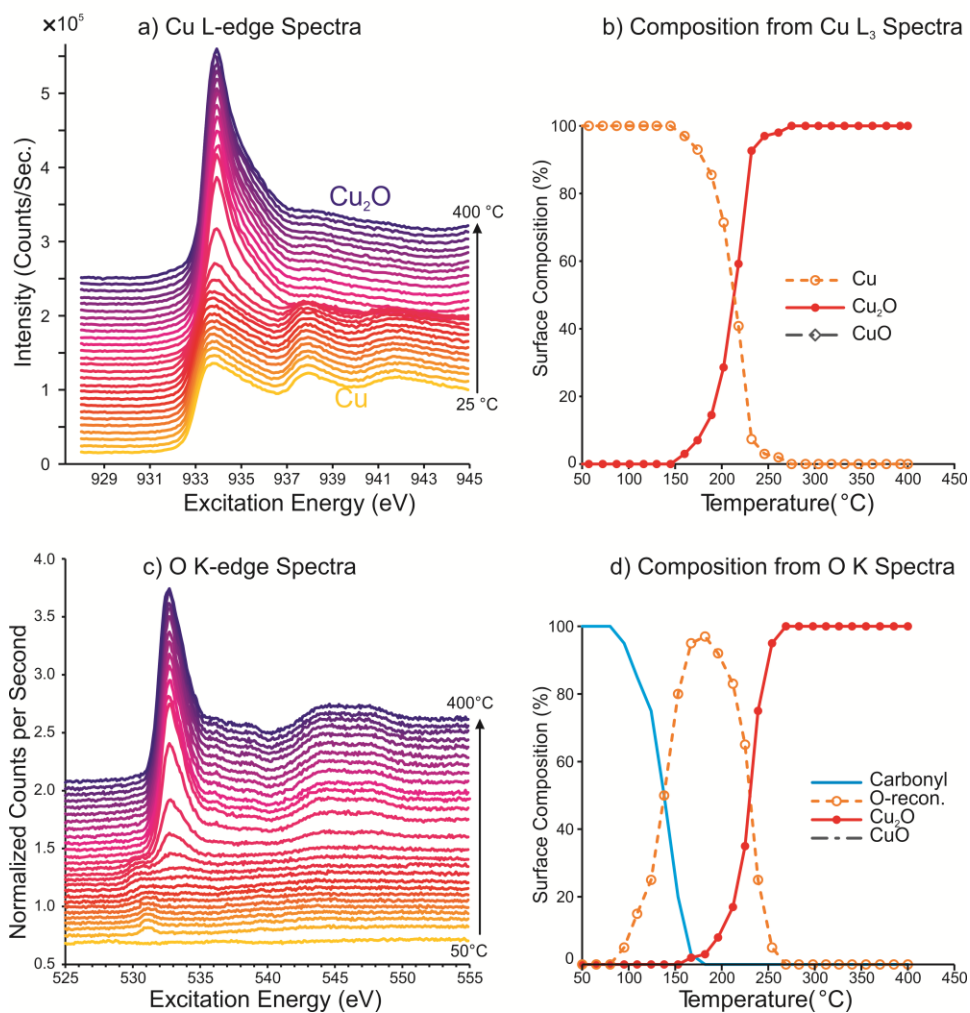

Figure S5 – (a) Cu L<sub>3</sub>-edge spectra, (b) Cu L<sub>3</sub> fitting, (c) O K-edge spectra and (d) O K-edge fitting of a reduced copper foil during a heating ramp in 0.15 mbar O<sub>2</sub> (i.e. first heating ramp).

# Heating ramp of oxidized Cu foil in O<sub>2</sub> (0.15 mbar)

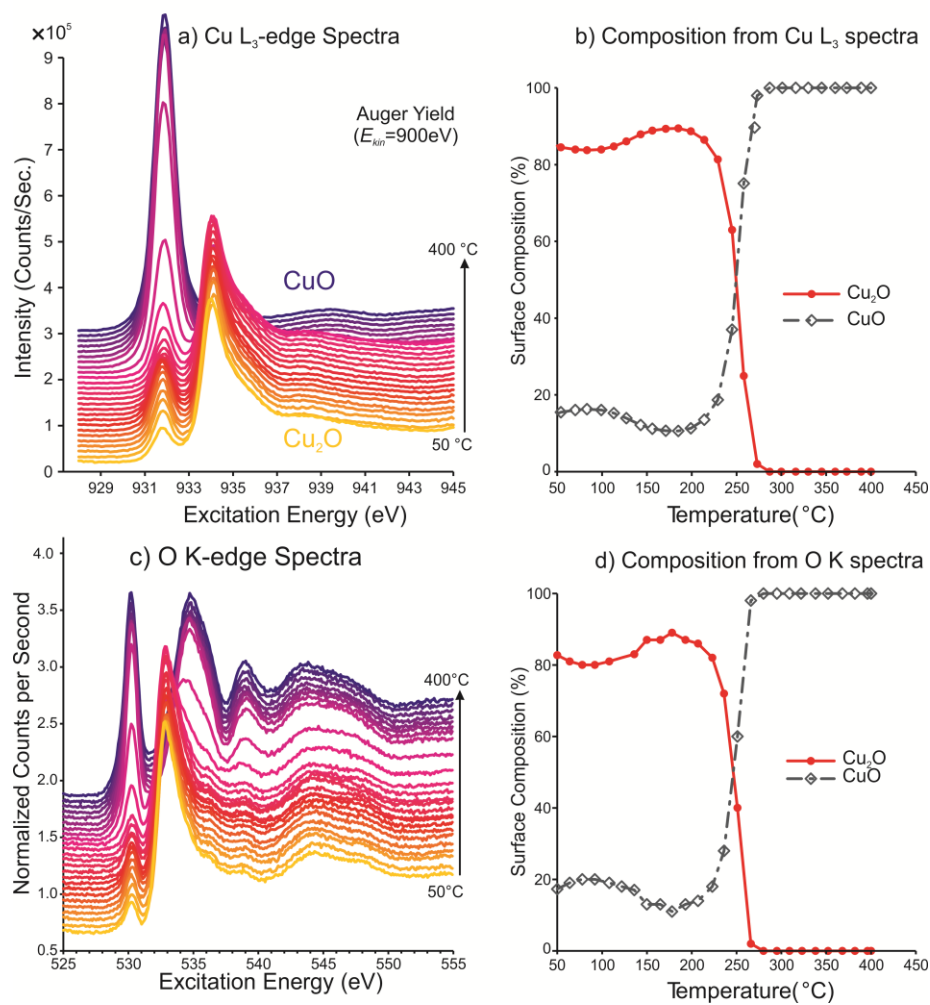

Figure S6 – (a) Cu L<sub>3</sub>-edge spectra, (b) Cu L<sub>3</sub> fitting, (c) O K-edge spectra and (d) O K-edge fitting of a pre-oxidized copper foil during a heating ramp in 0.15 mbar O<sub>2</sub> (i.e. second heating ramp).

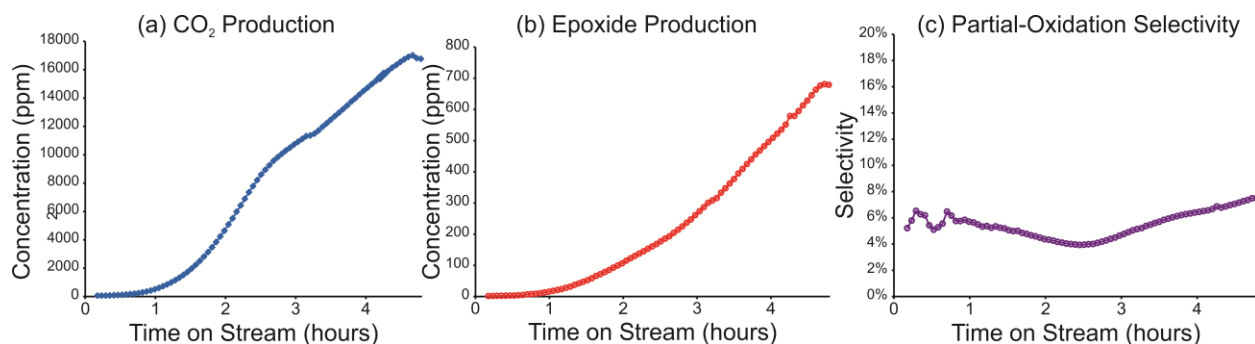

Figure S7 – Gas chromatography data from a silver foam in 1:1 O<sub>2</sub>+C<sub>2</sub>H<sub>4</sub> during a temperature ramp from 80°C to 380°C at 0.3 mbar.

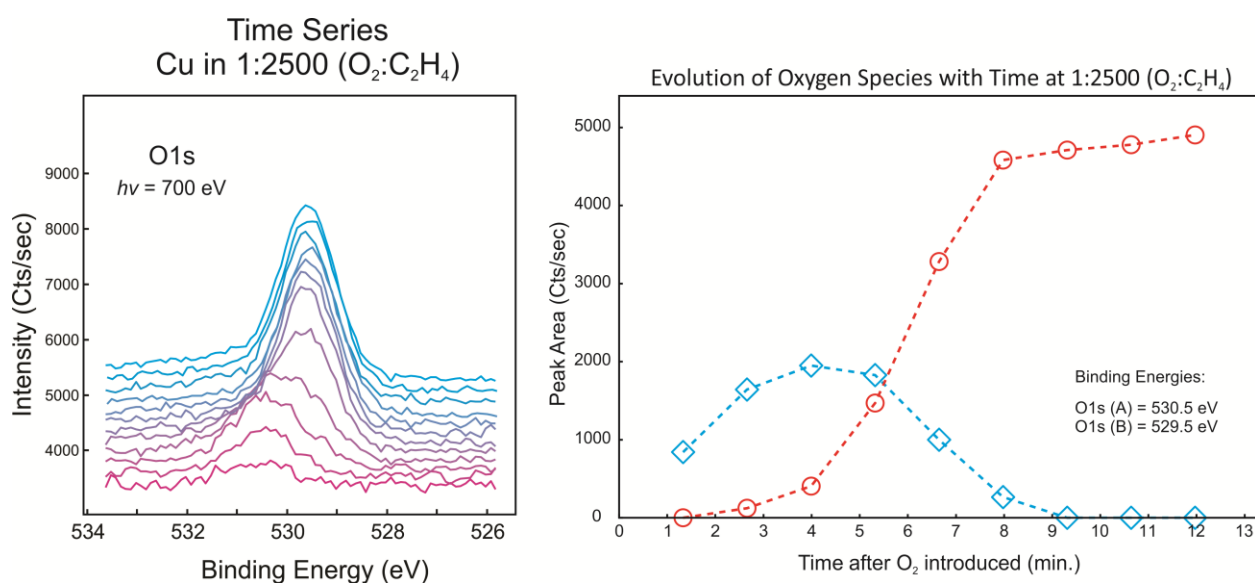

Figure S8 – (a) Time resolved O1s spectra of a reduced copper foil in a 1:2500 mixture of O<sub>2</sub>:C<sub>2</sub>H<sub>4</sub> at 350°C. (b) O1s peak composition versus time for the spectra in (a), using two peaks to fit the spectra, one at 530.5 eV and one at 529.5 eV.

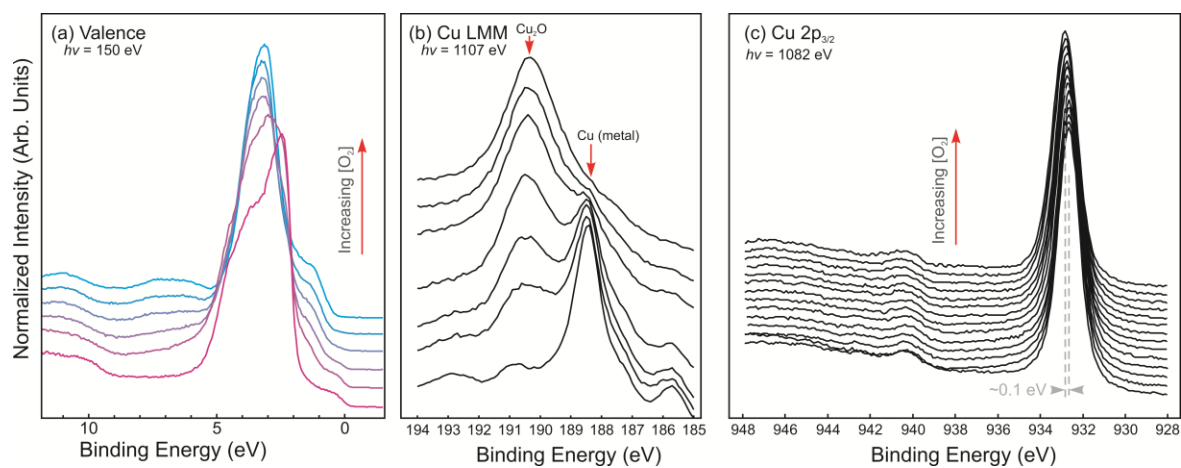

Figure S9 – (a) Valence spectra, (b) Cu LMM Auger spectra and (c) Cu 2p<sub>3/2</sub> spectra of a reduced copper foil in a gas atmosphere (0.3 mbar) of O<sub>2</sub> and C<sub>2</sub>H<sub>4</sub> ranging in composition from 1:2500 to 64:2500 (O<sub>2</sub>:C<sub>2</sub>H<sub>4</sub>) at 350°C.

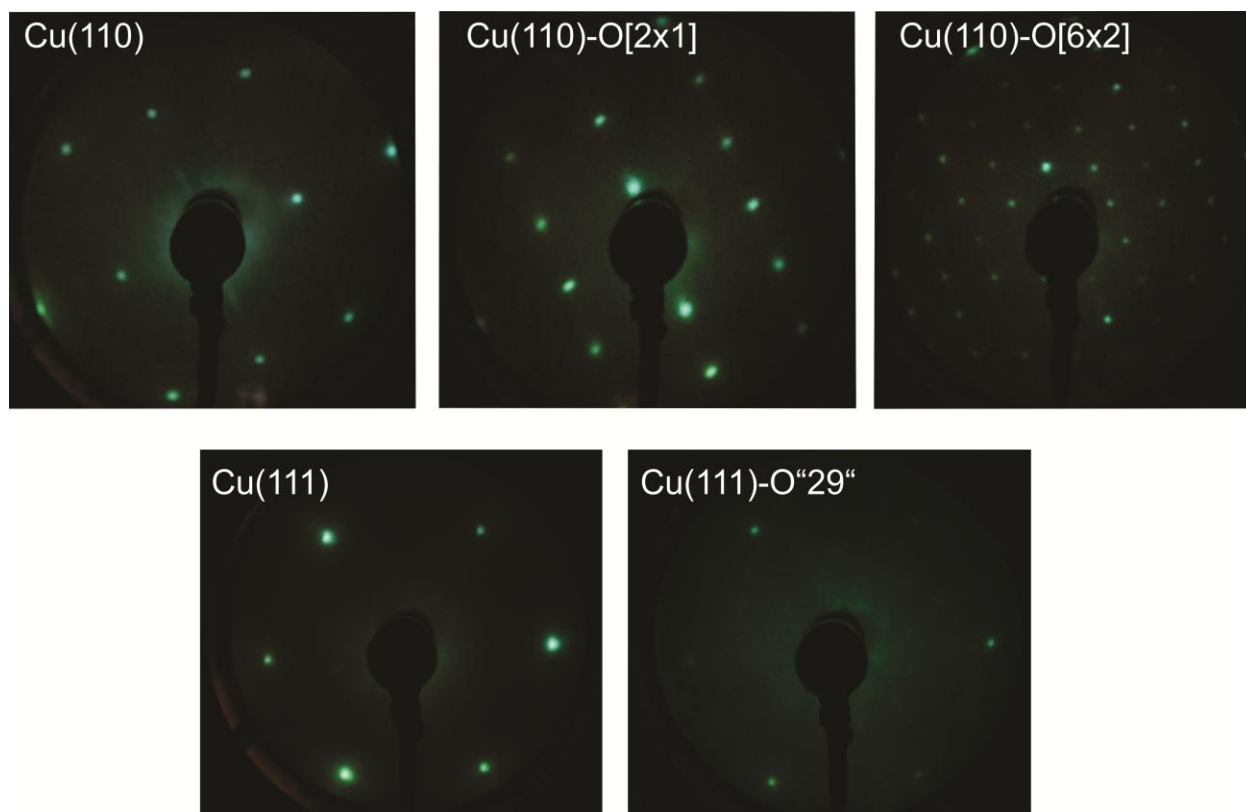

Figure S10 – LEED patterns of clean and O-terminated copper single crystals.



a) First three layers of perfect  $\text{Cu}_2\text{O}(111)$  surface

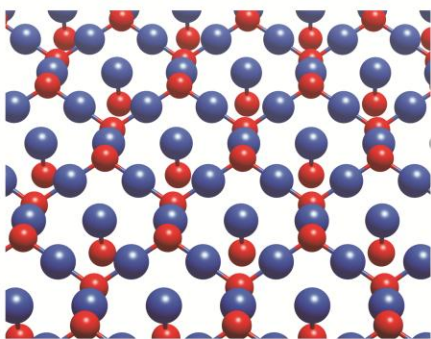

b) First three layers of defective  $\text{Cu}_2\text{O}(111)$  surface

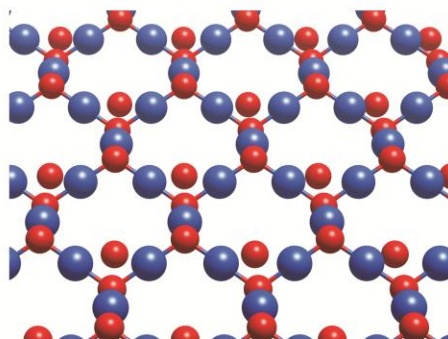

c) Side view of unit cell used for calculations of defective  $\text{Cu}_2\text{O}(111)$  surface

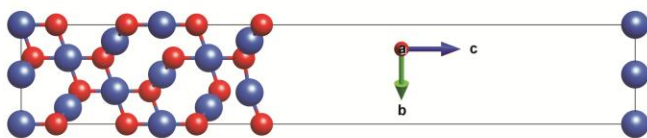

d) Top view of unit cell used for calculations of defective  $\text{Cu}_2\text{O}(111)$  surface

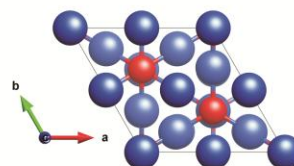

e)  $\text{Cu}_2\text{O}(110)$  surface

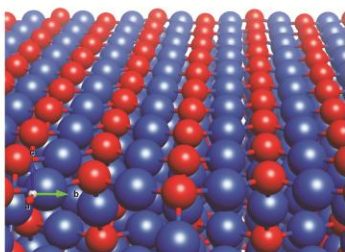

g) Top view of unit cell used for calculations of defective  $\text{Cu}_2\text{O}(111)$  surface

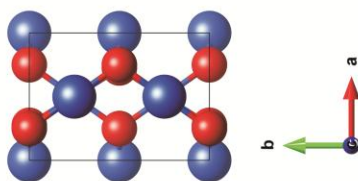

f) Side view of unit cell used for calculations of defective  $\text{Cu}_2\text{O}(111)$  surface

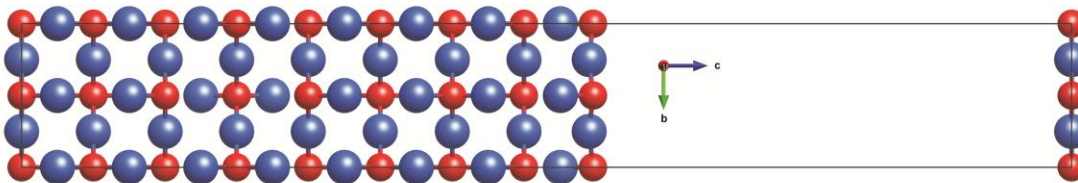

h) Two views of unit cell used for calculations of bulk stoichiometric vacancy in  $\text{Cu}_2\text{O}(111)$ . Vacancy highlighted with dashed circle

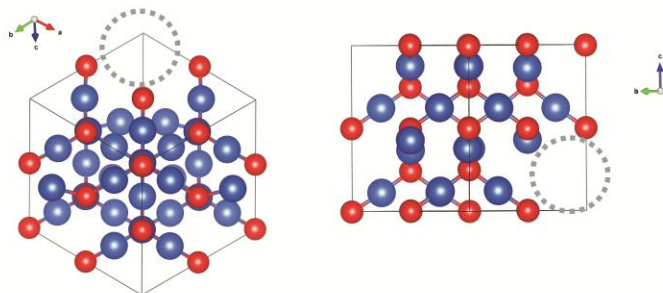

Figure S11



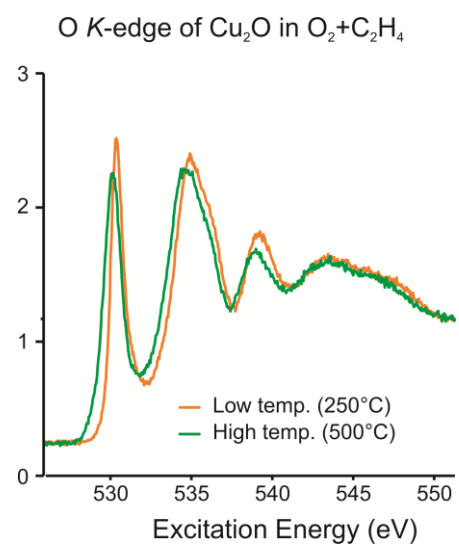

Figure S12
